# Supplementary material
Source: PubMed Central journal article supplement (PMC2775278)
Supplement: 0907262106_0907262106SI.pdf [file 0907262106_0907262106SI.pdf]

# Supporting Information

Patel et al. 10.1073/pnas.0907262106

## SI Methods

**mRNA Expression.** The following primers for the genes encoding nitric oxide synthase (DR2597) and glyceraldehyde 3-phosphate dehydrogenase (DR1343): nosF 5'ctgctccagcatctcgacgagcct 3', nosR 5' atgtccaggtgcatgctgctgatg 3', gapF 5' gagtacgacgaaag-cagcctgacg 3' and gapR 5' cgttgggtagctgtgcacggtggtc3'. Controls were carried out without addition of reverse transcriptase and with RNase treatment before PCR to confirm that amplified bands were not due to contamination by genomic sequences. The PCR (50  $\mu$ L) was carried out using the following cycling conditions: 98 °C for 5 min, 37 cycles of 95 °C for 1 min, 52 °C for 30 s, and 72 °C for 30 s. Samples were then electrophoresed on a 1% agarose gel, and stained with ethidium bromide. *nos*

message levels were compared to that of *gap*, whose expression is not altered by ultraviolet (UV) radiation. PCRs were confirmed to be within the linear range of amplification by varying amplification cycles.

The forward and reverse primers in the 5'  $\rightarrow$ 3' order for other genes are listed below:

obgE fp: ggctgaggaattacaacagctt  
obgE rp: aactcgggcaacaactggaata  
recA fp: gcaaactcgacgtgcaggtcgtcagca  
recA rp: gtgctcggcgtcgataaacgcacag  
uvrA fp: tcacgcaggttcttcagcgtgccgat  
uvrA rp: ggctgaagtttctggtggacgt  
uvsE fp: gctgtgctcacgcatctagcccgca  
uvsE rp: agcagattcaggcgtgcgcgccag

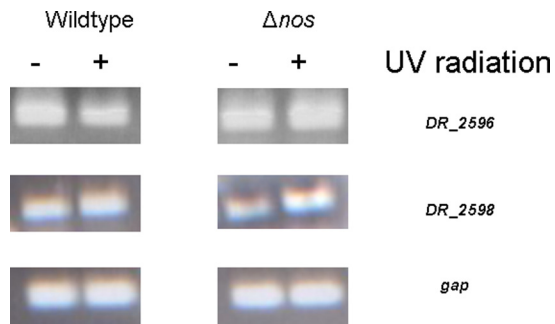

**Fig. S1.** The genes flanking DR\_2597 (*nos*): DR\_2596 and DR\_2598 code for proteins of unknown function. Their expression patterns remain unchanged in the  $\Delta nos$  compared to the wild-type strain under basal and postirradiation conditions. DR\_2596 is unaffected by radiation but DR\_2598 appears to be upregulated. This is not surprising as the ORFs for *nos* and *DR\_2598* are expressed on the same mRNA.

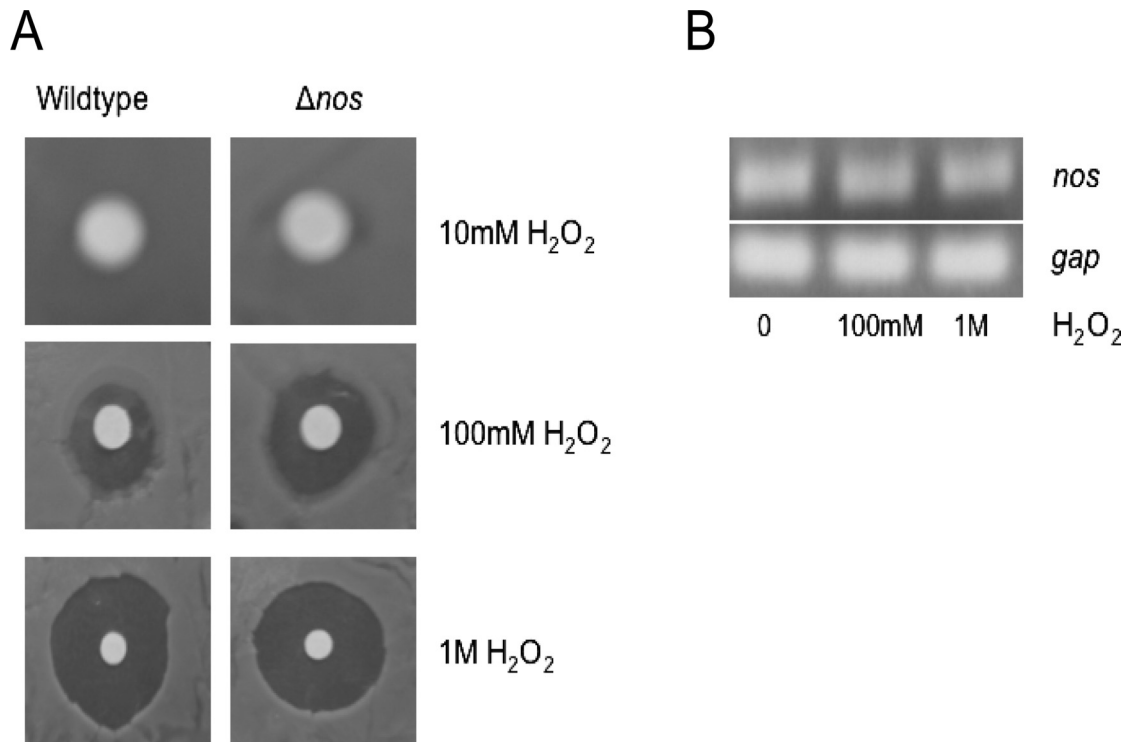

**Fig. S2.** (A)  $\Delta nos$  does not harbor a growth defect in the presence of peroxide. Wild-type and  $\Delta nos$  were grown to  $OD_{600} \sim 1$  at 30 °C. The cells were then plated on TGY agar plates, and a filter disk, saturated in the appropriate concentration of  $H_2O_2$ , was placed on top of the lawn. The plates were allowed to grow for 2 days at 30 °C.  $\Delta nos$  (right panel) is not affected by any concentration of  $H_2O_2$  compared to the wild-type (left panel), ruling against *nos* playing a protective role against peroxide in *Dr*. The same result is obtained if cells are grown in the presence of  $H_2O_2$  in liquid cultures. *Dr* shows high tolerance to peroxide, as cell growth is unaffected by 10 mM  $H_2O_2$ . (B) Additionally, the *nos* mRNA levels remain unchanged after exposure to as much as 1M  $H_2O_2$  for 1 h (more DNA was loaded at concentrations comparable to the UV irradiation experiment in Fig. 3 to clearly show the presence of the *nos* gene, which is not highly expressed under these conditions).

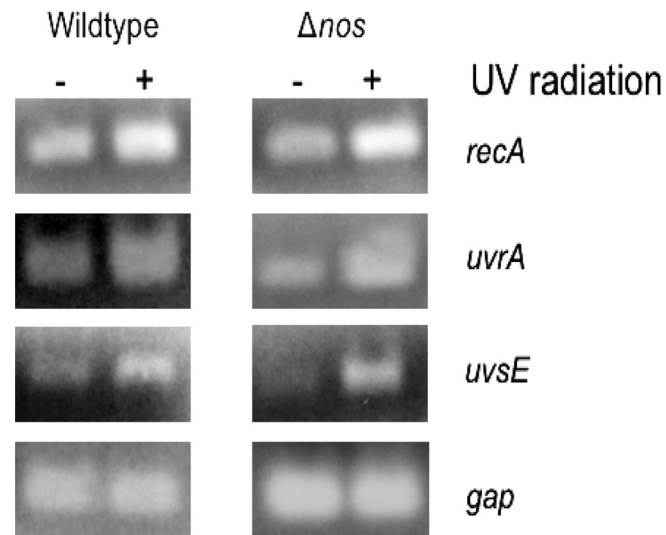

**Fig. S3.** NOS does not affect the induction of key UV DNA repair genes. mRNA expression levels were evaluated for *recA*, *uvrA*, and *uvsE* with the same procedure used to measure *nos* mRNA levels. In the wild-type, the mRNA levels of these genes increase after exposure to radiation. However,  $\Delta nos$  also shows a similar increase in mRNA levels. Thus, *nos* does not appear to be required for the induction of these repair genes.

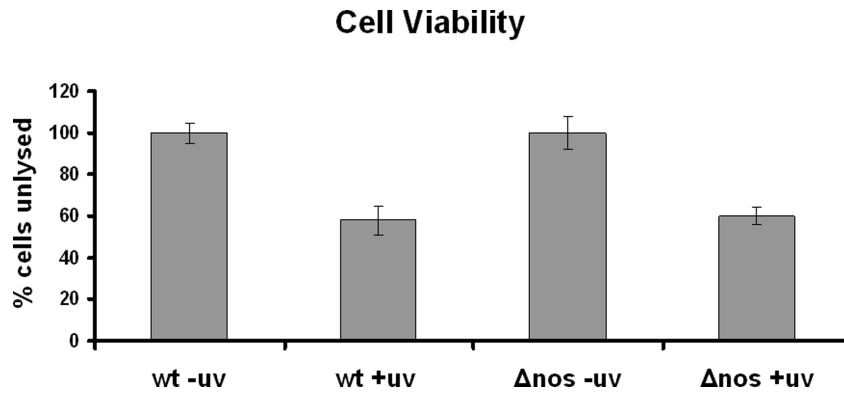

**Fig. S4.** The percent of input CFU viable following irradiation of wild-type and  $\Delta nos$  is the same using the LIVE/DEAD BacLight Bacterial Viability Kit (Molecular Probes). The assay has two fluorescent probes which can distinguish cells with intact membranes from those with damaged membranes. The experiment was carried out following the manufacturer's protocol.

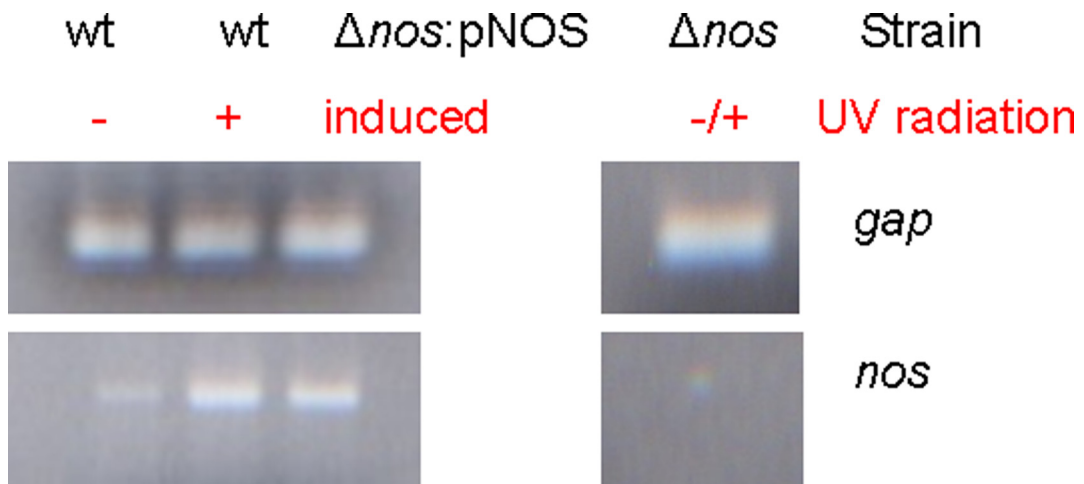

**Fig. S5.** *Nos* gene expression in the complemented strain. mRNA was extracted and converted to cDNA using protocols described in *Methods*. The expression levels of *nos* from the complementation ( $\Delta nos:pNOS$ ) is higher than the levels of wild-type without UV exposure; however, the levels are lower than wild-type with UV exposure.  $\Delta nos$  does not show any *nos* mRNA.

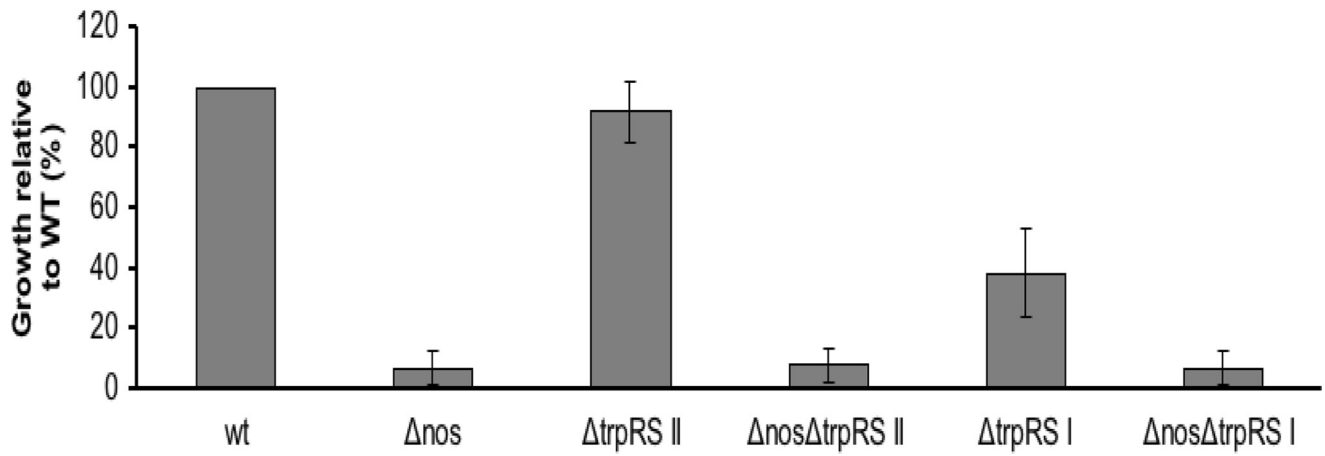

**Fig. S6.** Gene deletion of *trpRS I* and *trpRS II*. The  $\Delta nos$  strains show the largest growth defects following UV irradiation.  $\Delta trpRS II$  is unaffected by UV, while  $\Delta trpRS I$  grows 40% to that of wild-type because TrpRS I is the primary TrpRS in Dr. Both double knockouts  $\Delta nos\Delta trpRS II$  and  $\Delta nos\Delta trpRS I$  show growth patterns similar to the single mutant  $\Delta nos$ . Notably, growth of the  $\Delta trpRS I$  and  $\Delta trpRS II$  strains are not differentiated in the absence of UV exposure. Thus, TrpRS I provides an advantage only under stress conditions. The data represents an average of three independent experiments  $\pm$  SD.

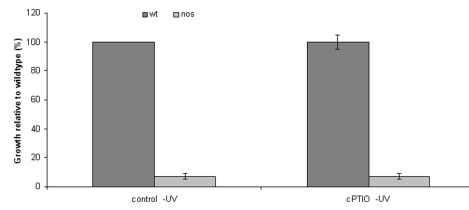

**Fig. S7.** Effects of secondary products on UV recovery. Both wt (dark gray bars) and  $\Delta nos$  (light gray bars) cells were grown for 22 h with pre-incubation (prt) of 10  $\mu\text{M}$  L-citrulline, 1 mM ferrous cyanide, and 100  $\mu\text{M}$  spermine after 5 min of UV radiation. Control cells were grown in the absence of supplemented chemicals. The relative growth of wt cells exposed to UV radiation was given a value of 100. The same protocol as in the main paper was followed for standardizing growth conditions. There was no change in the growth of the strains in the presence of these compounds without UV irradiation.



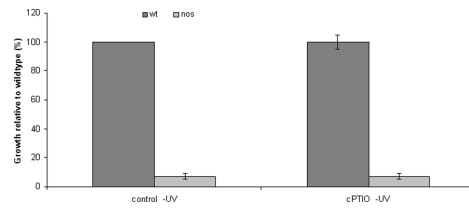

**Fig. S8.** 100  $\mu$ M cPTIO [2-(4-carboxyphenyl)-4,4,5,5-tetramethylimidazole-1-oxyl-3-oxide] was added to wt and  $\Delta nos$  for 10 min and has no effect on either WT or  $\Delta nos$  without UV irradiation. The same protocol for assaying growth with NO donor compounds and other additives was followed here.

| Condition Tested          | Reactive Oxygen Species (ROS) Detected |
|---------------------------|----------------------------------------|
| PBS + UV then NOHA        | -                                      |
| PBS + NOHA + UV           | +                                      |
| Anaerobic PBS + NOHA + UV | -                                      |
| Dr cells + UV then NOHA   | -                                      |
| Dr cells + NOHA – UV      | -                                      |
| Dr cells + NOHA + UV      | +                                      |

**Fig. S9.** Presence of reactive oxygen species (ROS) during and following UV irradiation. ROS generated during irradiation reacts with added N-hydroxyl-L-Arginine (NOHA) and lead to formation of nitrite, which can be detected by the Griess Assay. NOHA in anaerobic phosphate buffered saline (PBS) does not yield any ROS on irradiation as detected by this method, but aerobic PBS gives a strong nitrite signal. Likewise, if NOHA is added to cells and irradiated, large amounts of nitrite are detected. However, if NOHA is added, even seconds after irradiation is ceased, no nitrite production is observed. Thus, ROS are rapidly depleted after exposure ends.

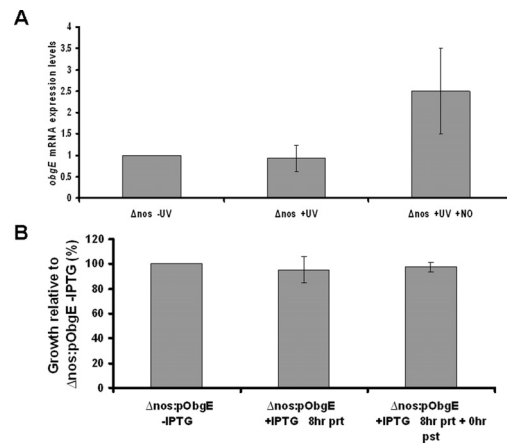

**Fig. 510.** (A) The mRNA levels of the *obgE* gene from  $\Delta nos$  cells without UV irradiation, after irradiation, and with irradiation on the addition of exogenous NO were measured using a similar protocol to that used for detecting expression of the *nos* gene. The level of *obgE* increases in the irradiated  $\Delta nos$  cells upon treatment with NO, although not to the same extent as that observed in the wt with UV irradiation (Fig. 5A). (B) The growth of  $\Delta nos:pObgE$  is unaffected upon induction of the *obgE* gene under normal growth conditions (no UV irradiation).
